# Supplementary material
Source: Royal Society of Chemistry journal article supplement (doi:10.1039/d6cp00952b)
Supplement: d6cp00952b1.pdf [file d6cp00952b1.pdf]

## CQDs hole transport layer enhanced photocatalytic performance of BiVO<sub>4</sub>-based type II heterojunctions for water splitting

Bin Wang, Guangxin He, Yan Wang, Nieyou Lin, Zihan Chen, Jie Li, Zhengbo Jiao\*

Institute of Materials for Energy and Environment, College of Materials Science and Engineering, Qingdao University, Qingdao 266071, P.R. China

### **Characterization**

Scanning electron microscope (SEM) measurements were conducted on a field emission scanning electron microscope (JSM-7800F, JEOL, Tokyo, Japan) with an acceleration voltage of 5 kV and a resolution of 0.8 nm. Transmission electron microscope (TEM) images were analyzed using the JEOL JEM-2100 Plus transmission electron microscope (Tokyo, Japan) at an accelerating voltage of 200 kV. The X-ray diffraction (XRD) patterns were obtained on a Rigaku Ultima IV instrument (Tokyo, Japan) utilizing Cu K $\alpha$  radiation (40 kV) at a scanning rate of 10 degrees/min. X-ray photoelectron spectroscopy (XPS) measurements were conducted on a PHI5000 VersaProbe III (ULVAC-PHI, Japan). The vacuum was in the range of 10<sup>-9</sup>-10<sup>-10</sup> mbar, and the X-ray source was an aluminum target with a photon energy of 1486.6 eV. The samples were prepared as homogeneous thin films or sheets that were mounted on the XPS stage. The analyzer type was a hemispherical energy analyzer, and the photoelectron pass energy for the survey spectrum was 280 eV and 69 eV for the narrow spectrum. Moreover, a dualbeam neutralization gun was utilized for automatic neutralization of the surface charge, and fitting was performed using the Gaussian Lorentzian approach. The analysis of the ultraviolet-visible (UV-vis) absorption spectra was conducted on an ultraviolet-visible spectrophotometer (UV- 2700, Tokyo, Japan). Additionally, a dual-beam system with a wavelength scanning range of 200-800 nm was used. The steady-state photoluminescence (PL) spectra were obtained

using an FLS1000 (Edinburgh, UK) at an excitation wavelength of 386 nm and a wavelength scanning range of 510-550 nm. PEC tests were performed with a standard three-electrode system on an electrochemical workstation (CHI 660E).

### **Photoelectrochemical measurements**

Photoelectrochemical testing was conducted at room temperature using a 0.1 M Na<sub>2</sub>SO<sub>4</sub> solution as the electrolyte. A three-electrode system was employed for PEC testing: a pre-fabricated BVO-based heterojunction photoanode as the working electrode, a Pt sheet electrode as the counter electrode, and a saturated calomel electrode (SCE) as the reference electrode. Linear sweep voltammetry (LSV), transient photocurrent response (I-T), electrochemical impedance spectroscopy (EIS), and stability tests were performed on samples under AM 1.5 simulated sunlight conditions using a CHI 660E electrochemical workstation.

Calculate the bandgap width of the photoanode using the following formula:

$$(\alpha h\nu)^n = A (h\nu - E_g)$$

Where  $\alpha$  is the absorption coefficient,  $h$  is Planck's constant,  $\nu$  is the incident light frequency,  $A$  is the proportionality constant, and  $E_g$  and  $n$  are the bandgap width and characteristic constant, respectively.

ABPE was calculated using the following formula:

$$ABPE = \frac{J(1.23 - V_{RHE})}{P_{light}} \times 100\%$$

Here,  $J$  denotes the current density obtained under applied bias, and  $P_{\text{light}}$  represents the incident light power density.

The IPCE of all photoanodes was determined by measuring the photocurrent density under specific wavelength sunlight at a voltage of 1.23 V vs RHE and calculated using the following formula:

$$IPCE = \frac{1240 \times J}{\lambda \times P_{\text{light}}} \times 100\%$$

Here,  $\lambda$  denotes the incident light wavelength,  $P_{\text{light}}$  represents the monochromatic light power density at each wavelength, and  $J$  indicates the photocurrent density.

The calculation formula for charge injection efficiency is as follows:

$$\eta_{inj} = \frac{J_{H_2O}}{J_{Na_2SO_3}} \times 100\%$$

The photocurrent densities  $J_{H_2O}$  and  $J_{Na_2SO_3}$  correspond to solutions not containing and containing the  $Na_2SO_3$  hole trap agent, respectively.

The charge separation efficiency is calculated using the following formula:

$$\eta_{sep} = \frac{J_{Na_2SO_3}}{J_{abs}} \times 100\%$$

$J_{Na_2SO_3}$  denotes the photocurrent density measured with sodium bisulfite as the electrolyte, while  $J_{abs}$  represents the theoretical maximum photocurrent density of the photoanode.

The transient photocurrent response and stability of the photoanode were tested under an applied bias voltage, and the transient decay time  $\tau$  was calculated from the transient photocurrent response.

$$D = \frac{I_t - I_{st}}{I_{in} - I_{st}}$$

Here,  $I_t$  (mA/cm<sup>2</sup>) denotes the photocurrent varying with time, while  $I_{st}$  (mA/cm<sup>2</sup>) and  $I_{in}$  (mA/cm<sup>2</sup>) represent the steady-state photocurrent and initial photocurrent, respectively. The electron lifetime ( $\tau_e$ ) is defined as the time at which  $\ln D = -1$ .

$$N_d = \frac{2}{e\epsilon\epsilon_0 A^2 m}$$

The formula for calculating the carrier density  $N_d$  is shown above, where  $e$  is the elementary charge ( $1.602 \times 10^{-19}$  C),  $\epsilon_0$  is the vacuum permittivity ( $8.854 \times 10^{-14}$  F·cm<sup>-1</sup>),  $\epsilon$  is the relative permittivity of the semiconductor material,  $A$  is the effective illumination area of the electrode, and  $m$  is the slope of the linear region of the Mott–Schottky plot.

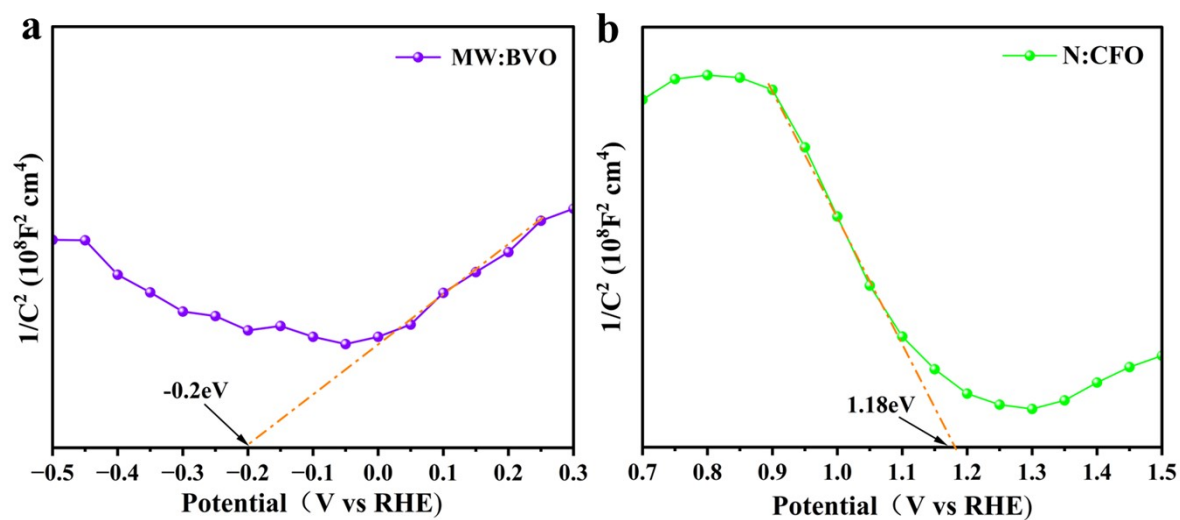

Fig. S1 Mott-Schottky plots of MW:BVO and N:CFO

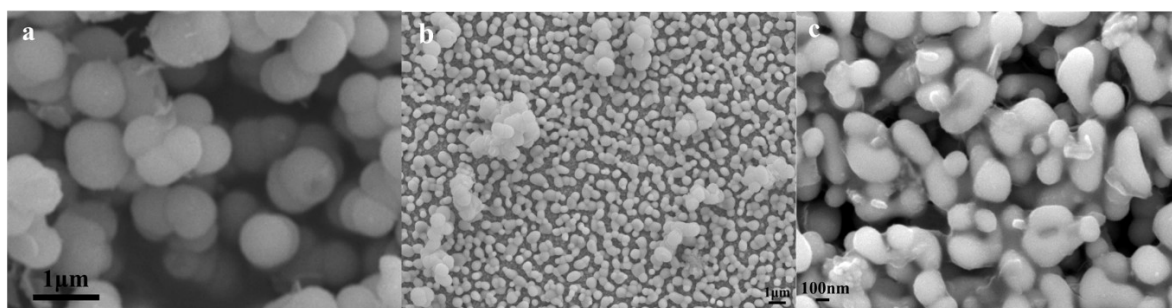

Fig. S2 SEM image of (a)N:CFO,(b) MW:BVO/N:CFO,(c) MW:BVO/CQDs

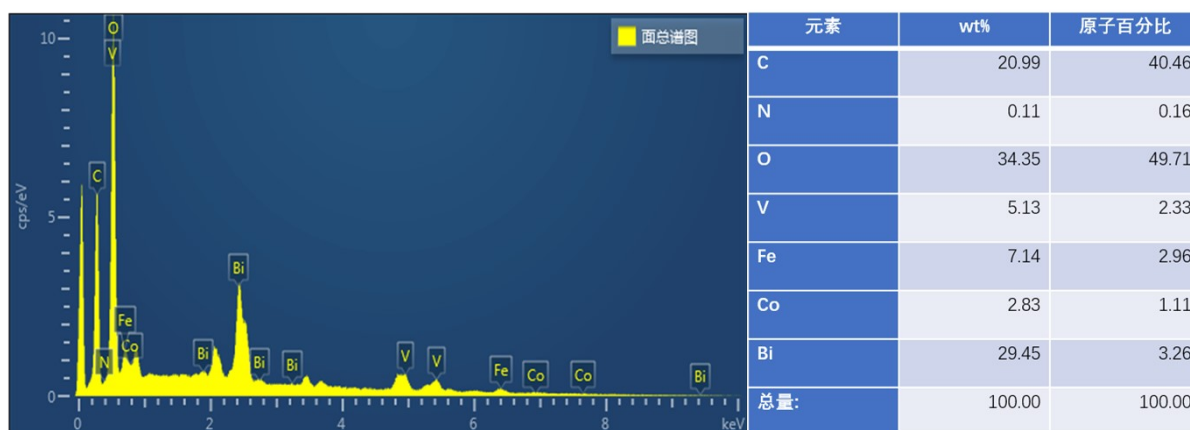

Fig.S3 Elemental content images of MW:BVO//N:CFO/CQDs

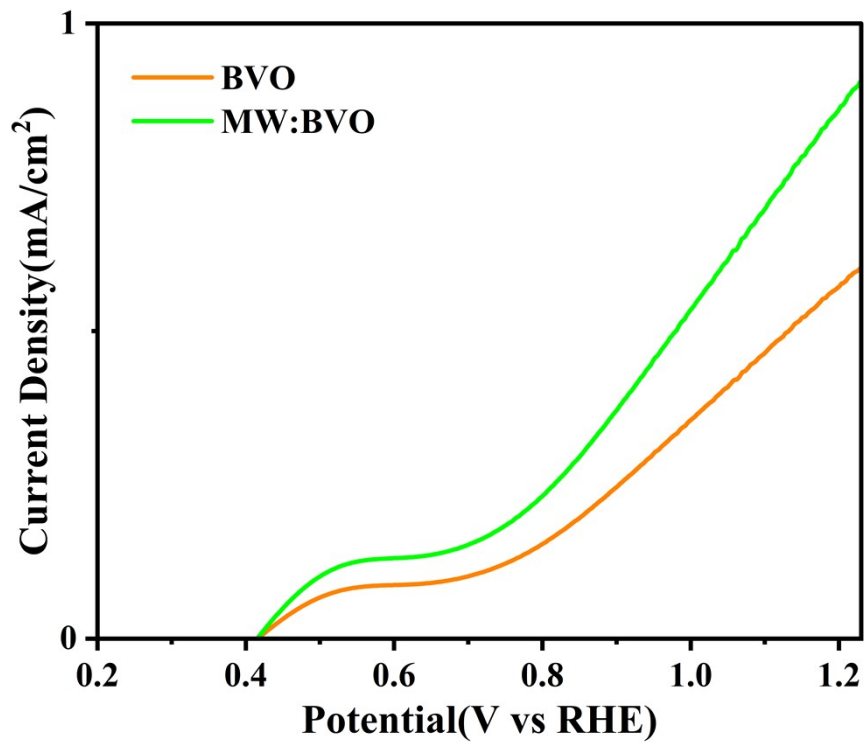

Fig. S4 LSV curve of BVO and Mo and W doped BVO.

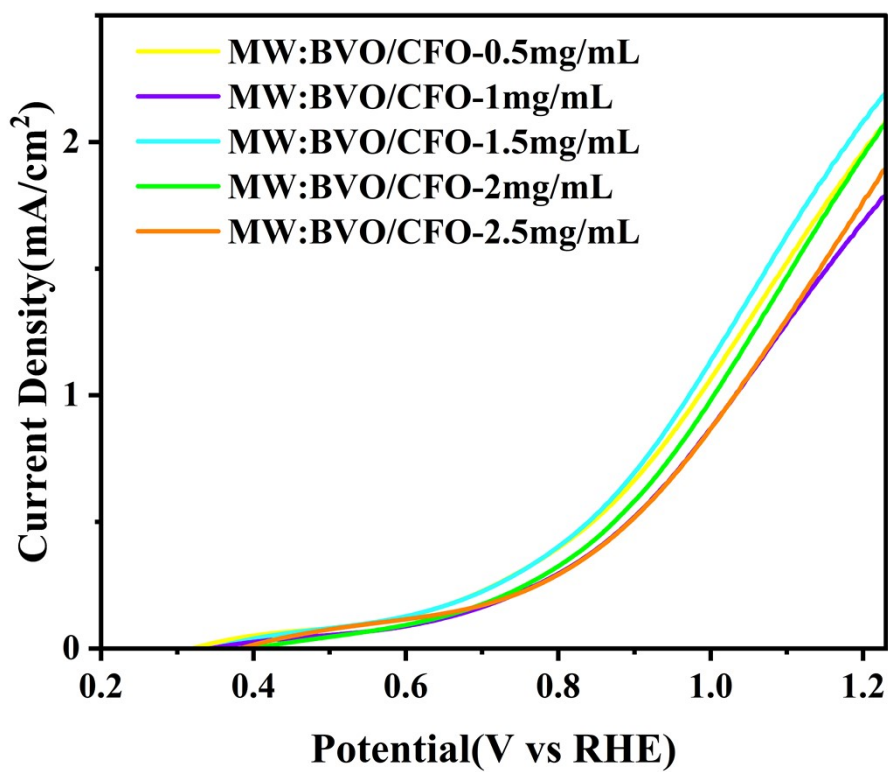

Fig.S5 LSV curves of MW:BVO/CFO with different concentrations

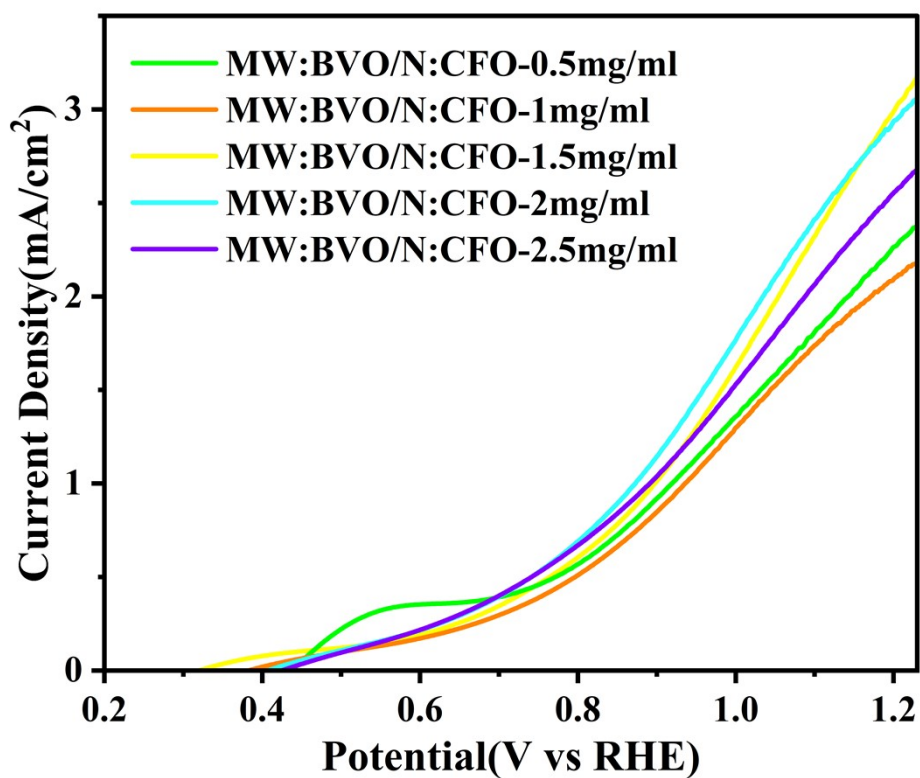

Fig. S6 LSV of MW:BVO/N:CFO with different concentrations

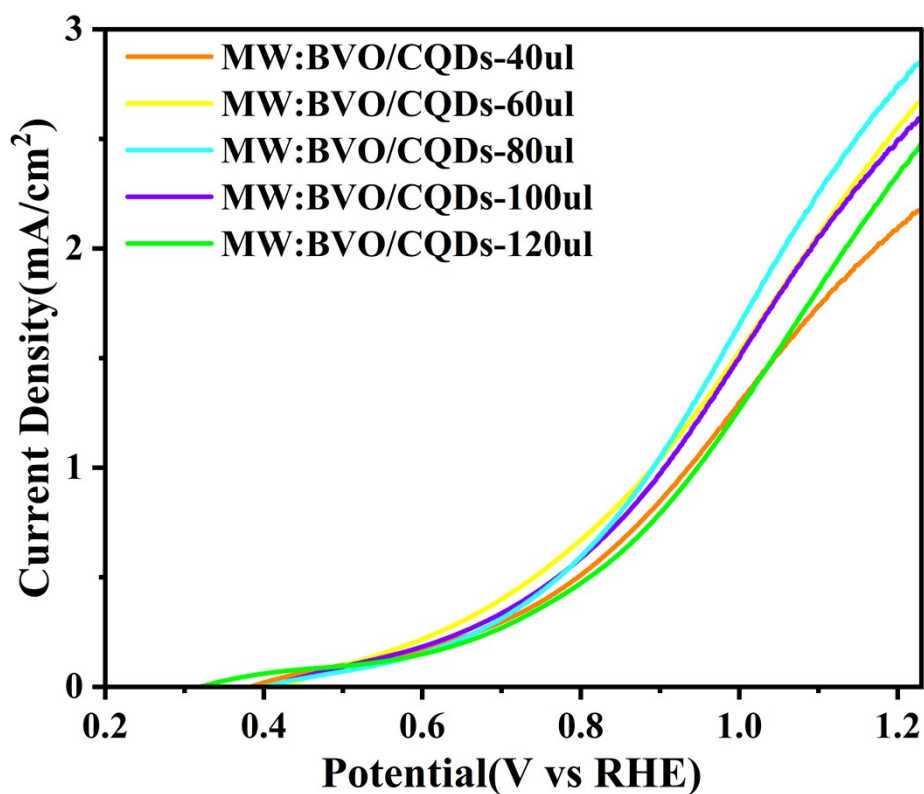

Fig. S7 LSV of MW:BVO/CQDs with different volumes

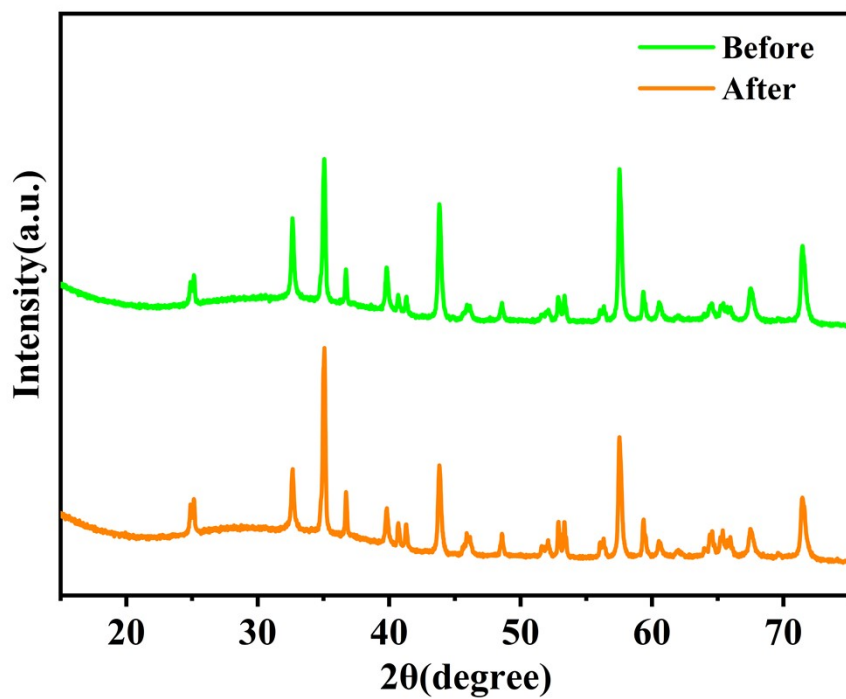

Fig. S8 XRD patterns of MW:BVO/N:CFO/CQDs

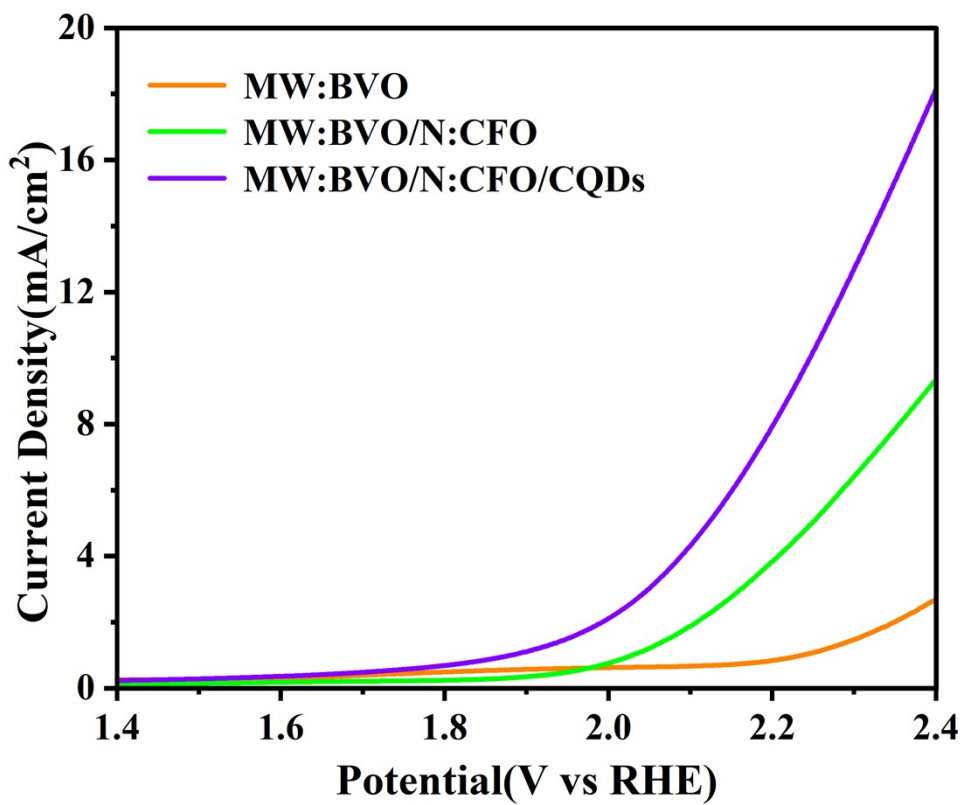

Fig. S9 LSV in the dark of MW:BVO-based photoelectrodes.

**Table S1 Comparison of our photoanode to other BiVO<sub>4</sub>-based photoanodes**

| photoanodes                                     | The photocurrent density at 1.23 V vs RHE (mA/cm <sup>2</sup> ) | Reference |
|-------------------------------------------------|-----------------------------------------------------------------|-----------|
| BVO/Cu <sub>2</sub> O/Co-Pi                     | 2.22                                                            | 1         |
| BVO/In <sub>2</sub> O <sub>3</sub> /FeOOH/NiOOH | 4.0                                                             | 2         |
| BVO/Bi/NiMOF/CoOOH                              | 4.7                                                             | 3         |
| BVO/CQDs/FeOOH                                  | 2.5                                                             | 4         |
| BVO/Ni <sub>3</sub> POM/FeOOH                   | 5.2                                                             | 5         |

**Table S2 EIS fitting data of MW:BVO-based photoanodes**

| photoanodes        | R <sub>S</sub> (Ω) | R <sub>CT</sub> (Ω) |
|--------------------|--------------------|---------------------|
| MW:BVO             | 23.25              | 19437               |
| MW:BVO/N:CFO       | 23.56              | 13144               |
| MW:BVO/ N:CFO/CQDs | 19.25              | 6728                |

**Table S3 Carrier density (Nd) of BiVO<sub>4</sub>-based photoanode**

| Sample             | Slope (10 <sup>8</sup> F <sup>-2</sup> cm <sup>4</sup> /V) | Nd (10 <sup>21</sup> cm <sup>-3</sup> ) |
|--------------------|------------------------------------------------------------|-----------------------------------------|
| MW:BVO             | 6.0                                                        | 7.84                                    |
| MW:BVO//N:CFO      | 4.94                                                       | 9.53                                    |
| MW:BVO//N:CFO/CQDs | 3.88                                                       | 12.13                                   |

1. X. Li, J. Wan, Y. Ma, Y. Wang and X. Li, Chemical Engineering Journal, 2020, <https://doi.org/10.1016/j.cej.2020.127054>.
2. D. Yin, X. Ning, Q. Zhang, P. Du and X. Lu, Journal of Colloid and Interface Science, 2023, <https://doi.org/10.1016/j.jcis.2023.04.173>.
3. J. Cui, M. Daboczi, M. Regue, Y. C. Chin, K. Pagano, J. Zhang, M. A. Isaacs, G. Kerherve, A. Mornto, J. West, S. Gimenez, J. S. Kim and S. Eslava, Advanced Functional Materials, 2022, <https://doi.org/10.1002/adfm.202270250>.
4. T. Zhou, S. Chen, J. Wang, Y. Zhang, J. Li, J. Bai and B. Zhou, Chemical Engineering Journal, 2020, <https://doi.org/10.1016/j.cej.2020.126350>.
5. C. Hu, C. Xu, X. Li, B. Li, X. Ma, J. Zhu, C. Dong and Y. Ding, ACS Sustainable Chemistry & Engineering, 2023, <https://doi.org/10.1021/acssuschemeng.3c00114>.
